# Supplementary material
Source: PubMed Central journal article supplement (PMC4733327)
Supplement: Supp_Fig1.pdf [file Supp_Fig1.pdf]

## Supplementary Data

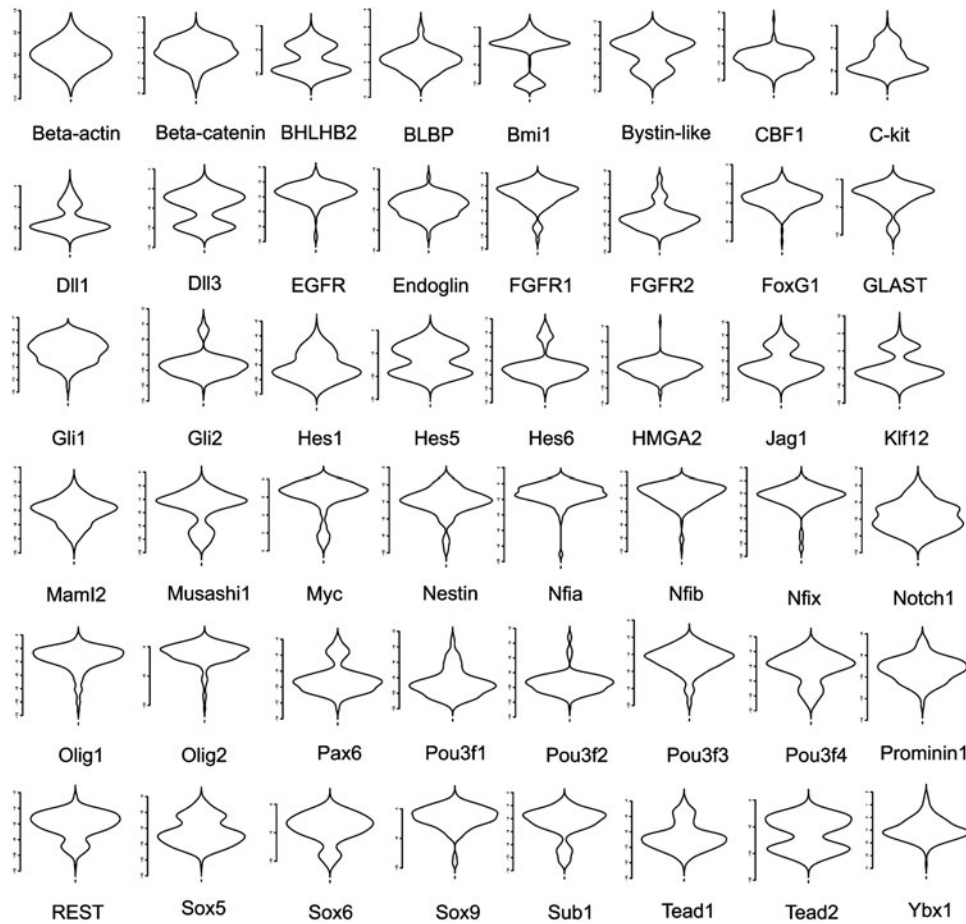

**SUPPLEMENTARY FIG. S1.** Violin plots for expression in unsorted cells. Violin plots representing the expression of each of the 48 genes analyzed in passage 2 unsorted cells. A multimodal distribution indicates actual gene expression differences, while stochastic noise exhibits a unimodal distribution.
