# Supplementary material
Source: PubMed Central journal article supplement (PMC4733327)
Supplement: Supp_Fig2.pdf [file Supp_Fig2.pdf]

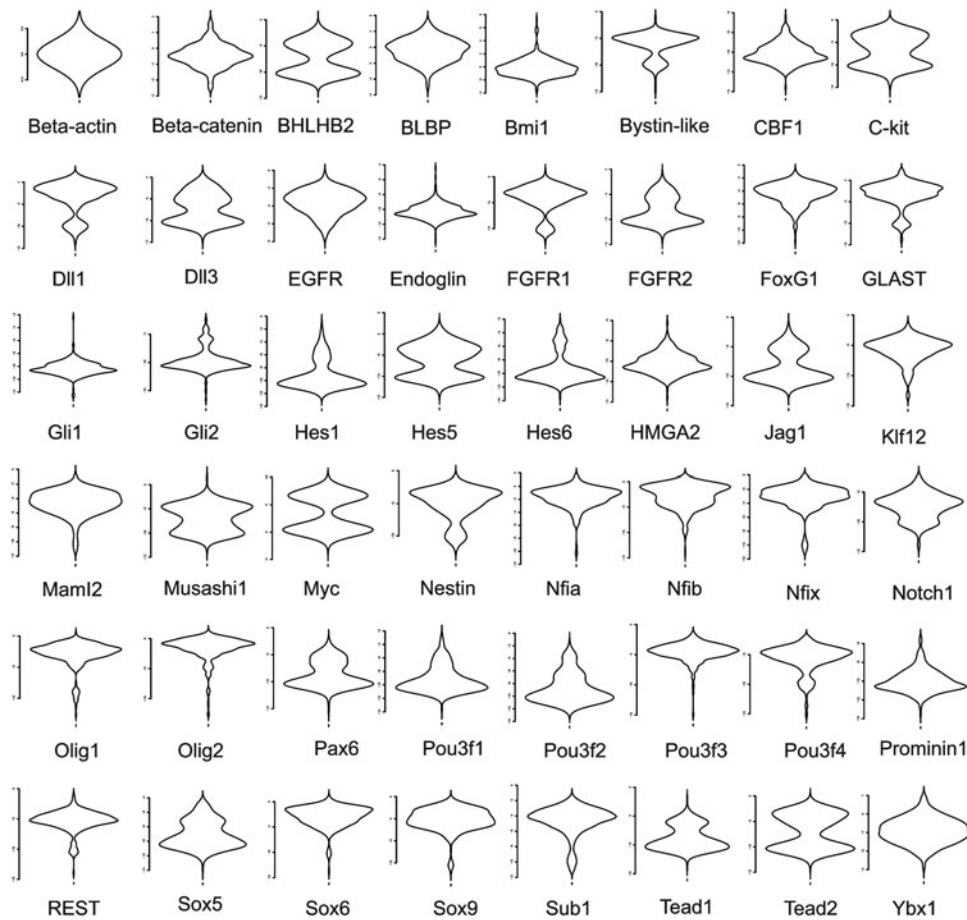

**SUPPLEMENTARY FIG. S2.** Violin plots for expression in FACS-sorted cells. Violin plots representing the expression of each of the 48 genes analyzed in passage 2 FACS-sorted cells. A multimodal distribution indicates actual gene expression differences, while stochastic noise exhibits a unimodal distribution. FACS, fluorescence-activated cell sorting.
