# Supplementary material
Source: PubMed Central journal article supplement (PMC4733327)
Supplement: Supp_Table1.pdf [file Supp_Table1.pdf]

SUPPLEMENTARY TABLE S1. SINGLE-CELL mRNA PROFILING ASSAY INFORMATION

| <i>Gene abbreviation</i> | <i>Full gene name</i>                                                     | <i>NCBI accession No.</i> | <i>Intron spanning</i> | <i>Taqman assay ID</i> |
|--------------------------|---------------------------------------------------------------------------|---------------------------|------------------------|------------------------|
| <i>Sox5</i>              | SRY-box-containing gene5                                                  | NM_011444.2               | No                     | Mm00488381_m1          |
| <i>Sox6</i>              | SRY-box-containing gene6                                                  | NM_001025559.2            | No                     | Mm00488393_m1          |
| <i>Sox9</i>              | SRY-box-containing gene9                                                  | NM_011448.4               | No                     | Mm00448840_m1          |
| <i>Hes1</i>              | Hairy and enhancer of split1                                              | NM_008235.2               | No                     | Mm01342805_m1          |
| <i>Hes5</i>              | Hairy and enhancer of split5                                              | NM_010419.4               | No                     | Mm00439311_g1          |
| <i>Hes6</i>              | Hairy and enhancer of split6                                              | NM_019479.3               | No                     | Mm00517097_g1          |
| <i>Notch1</i>            | Notch gene homolog1                                                       | NM_008714.3               | No                     | Mm00435249_m1          |
| <i>Jag1</i>              | Jagged1                                                                   | NM_013822.5               | No                     | Mm00496902_m1          |
| <i>Dll1</i>              | Delta-like1                                                               | NM_007865.3               | No                     | Mm00432841_m1          |
| <i>Dll3</i>              | Delta-like3                                                               | NM_007866.2               | No                     | Mm00432854_m1          |
| <i>CBF1</i>              | Recombination signal-binding protein<br>for immunoglobulin-kappa J region | NM_009035.4               | No                     | Mm00770450_m1          |
| <i>POU3f1</i>            | POU domain, class 3, transcription factor 1                               | NM_011141.2               | No                     | Mm00843534_s1          |
| <i>POU3f2</i>            | POU domain, class 3, transcription factor 2                               | NM_008899.1               | No                     | Mm00843777_s1          |
| <i>POU3f3</i>            | POU domain, class 3, transcription factor 3                               | NM_008900.2               | No                     | Mm00843792_s1          |
| <i>POU3f4</i>            | POU domain, class 3, transcription factor 4                               | NM_008901.1               | No                     | Mm00447171_s1          |
| <i>β-catenin</i>         | Cadherin-associated protein, beta1                                        | NM_001165902.1            | No                     | Mm01350394_m1          |
| <i>Olig1</i>             | Oligodendrocyte transcription factor1                                     | NM_016968.4               | No                     | Mm00497537_s1          |
| <i>Olig2</i>             | Oligodendrocyte transcription factor2                                     | NM_016967.2               | No                     | Mm01210556_m1          |
| <i>BHLHB2</i>            | Basic helix-loop-helix family, member e40                                 | NM_016967.2               | No                     | Mm00478593_m1          |
| <i>FGFR1</i>             | Fibroblast growth factor receptor1                                        | NM_001079908.1            | No                     | Mm01215485_g1          |
| <i>FGFR2</i>             | Fibroblast growth factor receptor 2                                       | NM_010207.2               | No                     | Mm004438941_m1         |
| <i>EGFR</i>              | Epidermal growth factor receptor                                          | NM_007912.4               | No                     | Mm01187858_m1          |
| <i>GLAST</i>             | Glutamate-aspartate transporter                                           | NM_148938.3               | No                     | Mm00600697_m1          |
| <i>BLBP</i>              | Brain lipid-binding protein                                               | NM_021272.3               | No                     | Mm00445225_m1          |
| <i>Prom1</i>             | Prominin1                                                                 | NM_001163577.1            | No                     | Mm00477115_m1          |
| <i>Bysl</i>              | Bystin-like                                                               | NM_016859.3               | No                     | Mm00479473_m1          |
| <i>Msi1</i>              | Musashi1                                                                  | NM_008629.1               | No                     | Mm00485224_m1          |
| <i>c-kit</i>             | c-kit oncogene                                                            | NM_001122733.1            | No                     | Mm00445212_m1          |
| <i>Eng</i>               | Endoglin                                                                  | NM_001146348.1            | No                     | Mm03023983_m1          |
| <i>Nes</i>               | Nestin                                                                    | NM_016701.3               | No                     | Mm00450205_m1          |
| <i>Gli1</i>              | GLI-Kruppel family member1                                                | NM_010296.2               | No                     | Mm00494645_m1          |
| <i>Gli2</i>              | GLI-Kruppel family member2                                                | NM_001081125.1            | No                     | Mm01293117_m1          |
| <i>Pax6</i>              | Paired box gene6                                                          | NM_013627.4               | No                     | Mm00443081_m1          |
| <i>Myc</i>               | Myelocytomatosis oncogene                                                 | NM_001177352.1            | No                     | Mm00487804_m1          |
| <i>Bmi1</i>              | Bmi1 polycomb ring-finger oncogene                                        | NM_007552.4               | No                     | Mm00776122_gH          |
| <i>REST</i>              | RE1-silencing transcription factor                                        | NM_011263.2               | No                     | Mm00803268_m1          |
| <i>FoxG1</i>             | Forkhead box G1                                                           | NM_001160112.1            | No                     | Mm02059886_s1          |
| <i>Nfia</i>              | Nuclear factor I/A                                                        | NM_001122952.1            | No                     | Mm00447981_m1          |
| <i>Nfib</i>              | Nuclear factor I/B                                                        | NM_001113209.1            | No                     | Mm00500784_m1          |
| <i>Nfix</i>              | Nuclear factor I/X                                                        | NM_001081982.1            | No                     | Mm00477796_m1          |
| <i>Mam12</i>             | Mastermind-like2                                                          | NM_001013813.3            | No                     | Mm00620617_m1          |
| <i>Klf12</i>             | Kruppel-like factor12                                                     | NM_010636.3               | No                     | Mm00516098_m1          |
| <i>Tead1</i>             | TEA domain family member1                                                 | NM_001166584.1            | No                     | Mm00493503_m1          |
| <i>Tead2</i>             | TEA domain family member 2                                                | NM_011565.2               | No                     | Mm00449004_m1          |
| <i>Ybx1</i>              | Y box protein 1                                                           | NM_011732.2               | No                     | Mm00850878_g1          |
| <i>Sub1</i>              | SUB1 homolog                                                              | NM_011294.3               | No                     | Mm00726782_s1          |
| <i>HMGA2</i>             | High-mobility group AT-hook 2                                             | NM_010441.2               | No                     | Mm00780304_sH          |
| <i>β-actin</i>           | Beta-actin                                                                | NM_007393.3               | No                     | Mm01205647_g1          |

The 48 genes were selected under the assumption that they regulate cell fate.
